# Supplementary material for: The gut microbiome as a target for prevention and treatment of hyperglycaemia in type 2 diabetes: from current human evidence to future possibilities
Source: PubMed Central journal article supplement (PMC5423958; doi:10.1007/s00125-017-4278-3), 2017-04-22
Supplement: 125_2017_4278_MOESM2_ESM.pdf [file 125_2017_4278_MOESM2_ESM.pdf]

## Gut microbiome as a prevention and treatment target for hyperglycaemia of type 2 diabetes: from current human evidence to future possibilities

ESM Table1 – Sequencing methods used in the studies referred

| Reference number | First author        | Title                                                                                                                                                                                               | Sequencing method                   |
|------------------|---------------------|-----------------------------------------------------------------------------------------------------------------------------------------------------------------------------------------------------|-------------------------------------|
| 3                | Faloney             | Population-level analysis of gut microbiome variation                                                                                                                                               | 16S sequencing                      |
| 4                | Zherenokova         | Population-based metagenomics analysis reveals markers for gut microbiome composition and diversity                                                                                                 | Metagenomic sequencing              |
| 7                | Larsen              | Gut microbiota in human adults with type 2 diabetes differs from non-diabetic adults                                                                                                                | 16S sequencing                      |
| 8                | Zhang               | Human gut microbiota changes reveal the progression of glucose intolerance                                                                                                                          | 16S DNA                             |
| 10               | Karlsson            | Gut metagenome in European women with normal, impaired and diabetic glucose control                                                                                                                 | Metagenomic sequencing              |
| 11               | Forslund            | Disentangling type 2 diabetes and metformin treatment signatures in the human gut microbiota                                                                                                        | Metagenomic sequencing              |
| 12               | Qin                 | A metagenome-wide association study of gut microbiota in type 2 diabetes                                                                                                                            | Metagenomic sequencing              |
| 13               | Pedersen            | Human gut microbes impact host serum metabolome and insulin sensitivity                                                                                                                             | Metagenomic sequencing              |
| 15               | Dao                 | Akkermansia muciniphila and improved metabolic health during a dietary intervention in obesity: relationship with gut microbiome richness and ecology                                               | Metagenomic sequencing              |
| 16               | David               | Diet rapidly and reproducibly alters the human gut microbiome                                                                                                                                       | 16S sequencing                      |
| 19               | Tap                 | Gut microbiota richness promotes its stability upon increased dietary fibre intake in healthy adults                                                                                                | 16S sequencing                      |
| 20               | Martinez            | Gut microbiome composition is linked to whole grain-induced immunological improvements                                                                                                              | 16S sequencing                      |
| 21               | De Filippo          | Impact of diet in shaping gut microbiota revealed by a comparative study in children from Europe and rural Africa                                                                                   | 16S sequencing                      |
| 22               | Kovatcheva-Datchary | Dietary fiber-induced improvement in glucose metabolism is associated with increased abundance of Prevotella                                                                                        | 16S sequencing                      |
| 20               | Tremaroli           | Improved glucose metabolism following bariatric surgery is associated with increased circulating bile acid concentrations and remodeling of the gut microbiome                                      | Metagenomics sequencing             |
| 32               | Korpela             | Gut microbiota signatures predict host and microbiota responses to dietary interventions in obese individuals                                                                                       | 16S sequencing                      |
| 33               | Le Chatelier        | Richness of human gut microbiome correlates with metabolic markers                                                                                                                                  | Metagenomics sequencing             |
| 34               | Salonen             | Impact of diet and individual variation on intestinal microbiota composition and fermentation products in obese men                                                                                 | 16S sequencing and quantitative PCR |
| 35               | Healey              | Influence of habitual dietary fibre intake on the responsiveness of the gut microbiota to a prebiotic: protocol for a randomised, double-blind, placebo-controlled, cross-over, single-centre study | 16S sequencing                      |
| 39               | Zhang               | Environmental spread of microbes impacts the development of metabolic phenotypes in mice transplanted with microbial communities from humans                                                        | 16S sequencing                      |

**Gut microbiome as a prevention and treatment target for hyperglycaemia of type 2 diabetes: from current human evidence to future possibilities**

|    |           |                                                                                                                         |                        |
|----|-----------|-------------------------------------------------------------------------------------------------------------------------|------------------------|
| 42 | Vrieze    | Transfer of intestinal microbiota from lean donors increases insulin sensitivity in individuals with metabolic syndrome | HITChip                |
| 47 | Goodrich  | Genetic determinants of the gut microbiome in UK twins                                                                  | 16S sequencing         |
| 48 | Davenport | Genome-wide association studies of the human gut microbiota                                                             | 16S sequencing         |
| 49 | Bonder    | The effect of host genetics on the gut microbiome                                                                       | Metagenomic sequencing |
